# Supplementary material
Source: MDPI journal article supplement (https://www.mdpi.com/2412-382X/3/4/24)
Supplement: s1 [file s1]

## Supplementary Information:

### Ab Initio Molecular Dynamics Simulations to Interpret the Molecular Fragmentation Induced in Deoxyribose by Synchrotron Soft X-Rays

Marie-Anne Hervé du Penhoat<sup>1,\*</sup>, Anis Hamila<sup>1</sup>, Marie-Pierre Gageot<sup>2</sup>,  
Rodolphe Vuilleumier<sup>3</sup>, Kentaro Fujii<sup>4</sup>, Akinari Yokoya<sup>4</sup> and Marie-Françoise Politis<sup>2</sup>

<sup>1</sup>IMPMC, Sorbonne Université, UMR CNRS 7590, MNHN, 75005 Paris, France

<sup>2</sup>LAMBE UMR8587, Université d'Evry val d'Essonne, CNRS, CEA, Université Paris-Saclay, 91025, Evry, France

<sup>3</sup>PASTEUR, Département de chimie, École normale supérieure, PSL University, Sorbonne Université, CNRS, 75005 Paris, France

<sup>4</sup>National Institutes for Quantum and Radiological Science and Technology, 319-1106 Tokai, Japan

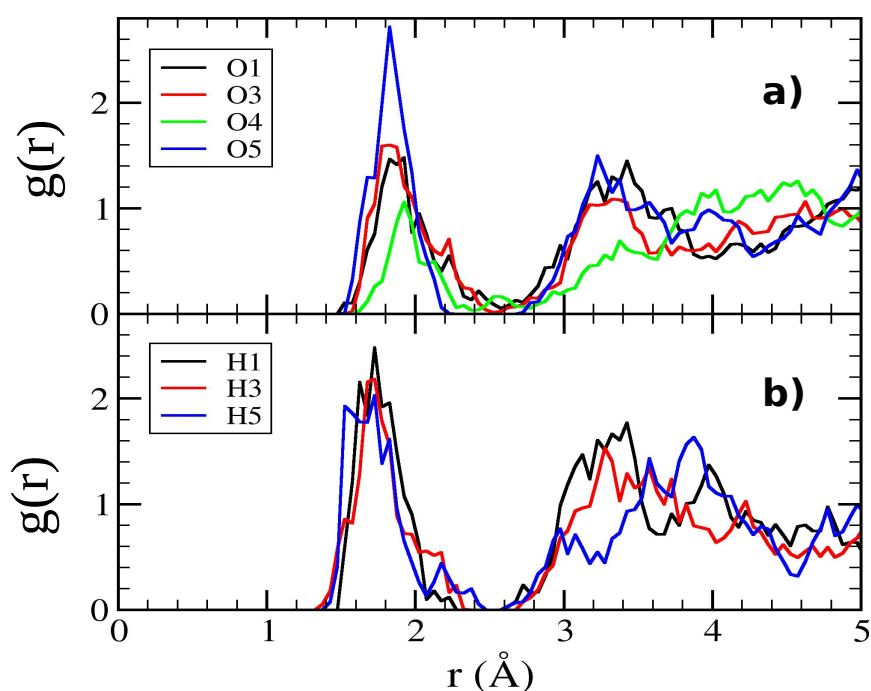

**Figure S1 :** Radial distribution function of (a) water hydrogen around deoxyribose (DR) oxygen (O1, O3, O4 and O5), and (b) water oxygen around DR hydrogen (H1, H3, and H5).
